# Supplementary material for: Distance-based paper microfluidic devices for rapid visual quantification of heavy metals in herbal supplements and cosmetics
Source: Royal Society of Chemistry journal article supplement (doi:10.1039/d4ra05358c), 2024-01-01
Supplement: d4ra05358c1.pdf [file d4ra05358c1.pdf]

### Supplementary information

Table S1 Composition of cream base

| Phase | Composition                                                       | Amount (%w/w)        |
|-------|-------------------------------------------------------------------|----------------------|
| A     | DI water                                                          | q.s. to 100          |
|       | Propylene glycol                                                  | 30                   |
|       | Glycerin                                                          | 3                    |
|       | EDTA                                                              | 0.1                  |
|       | Acrylates/C10-30 alkyl acrylate crosspolymer                      | 0.5                  |
|       | Dehydroxanthan gum                                                | 0.5                  |
|       | DI water                                                          | 30                   |
| B     | Ceteareth-6 (and) stearyl alcohol                                 | 2.5                  |
|       | Ceteareth-25                                                      | 2.5                  |
|       | Cetyl alcohol                                                     | 1                    |
|       | Stearyl alcohol                                                   | 1                    |
| C     | Neopentyl glycol diheptanoate, isododecane                        | 3                    |
|       | Dicaprylyl ether                                                  | 1                    |
|       | Paraffinoma liquidum                                              | 3                    |
|       | Isopropyl myristate                                               | 3                    |
|       | Propylene glycol, diazolidinyl urea, methylparaben, propylparaben | 0.75                 |
|       | Tocopheryl acetate                                                | 0.5                  |
|       | Triethanolamine                                                   | adjust to pH 6.0-7.0 |

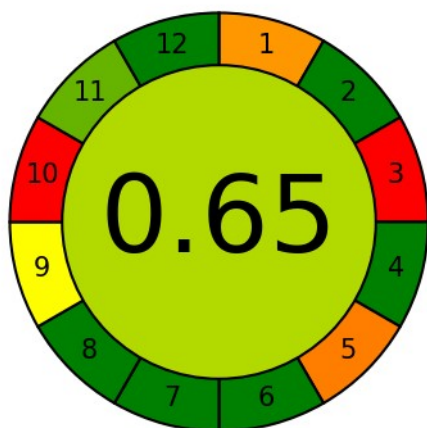

Fig. S1 Analytical GREennEss (AGREE) analysis of the proposed method.

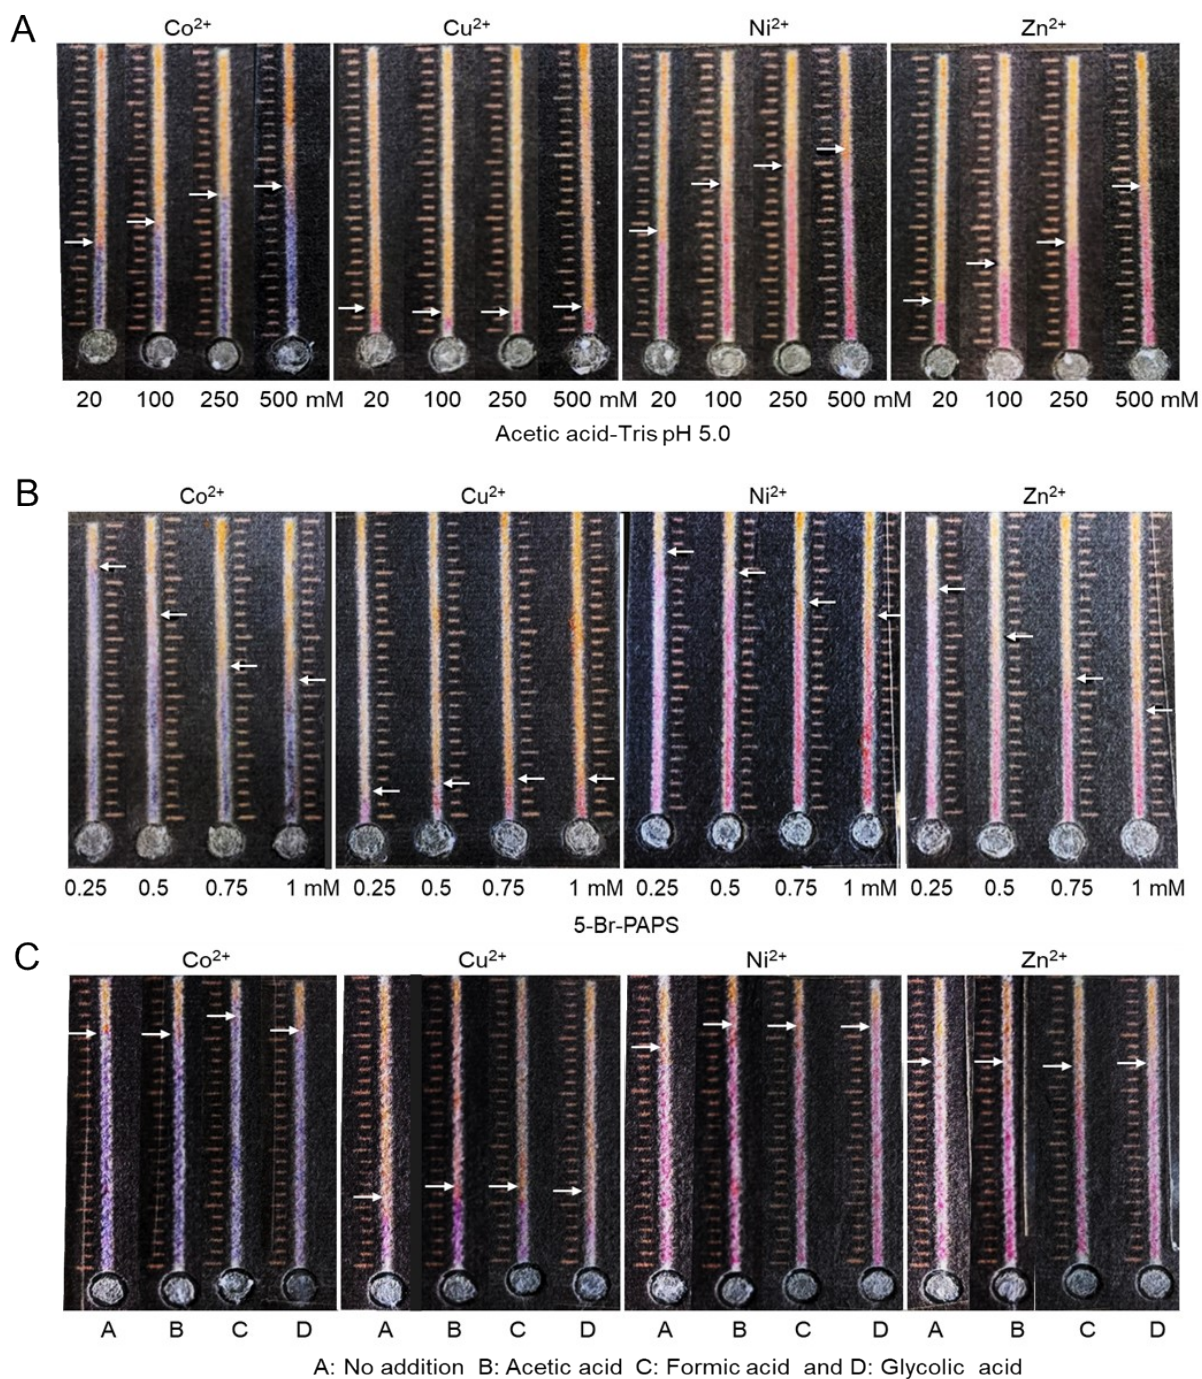

Fig

. S2 Effects of (A) buffer concentration, (B) 5-Br-PAPS concentration in acetic acid-Tris pH 5.0, and (C) types of auxiliary complexing agents on the D $\mu$ PADs for metal detection.

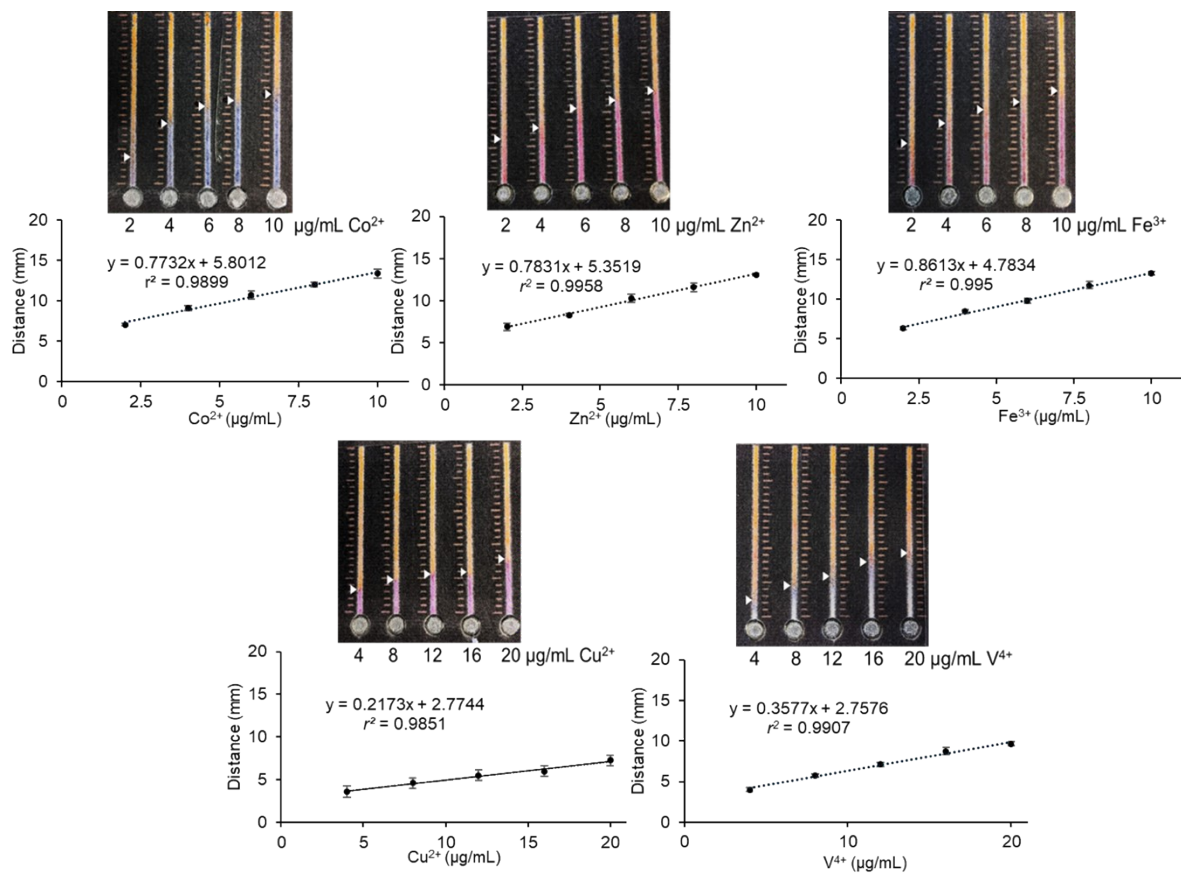

Fig. S3 Calibration curves of Co<sup>2+</sup>, Cu<sup>2+</sup>, Fe<sup>3+</sup>, V<sup>4+</sup> and Zn<sup>2+</sup>

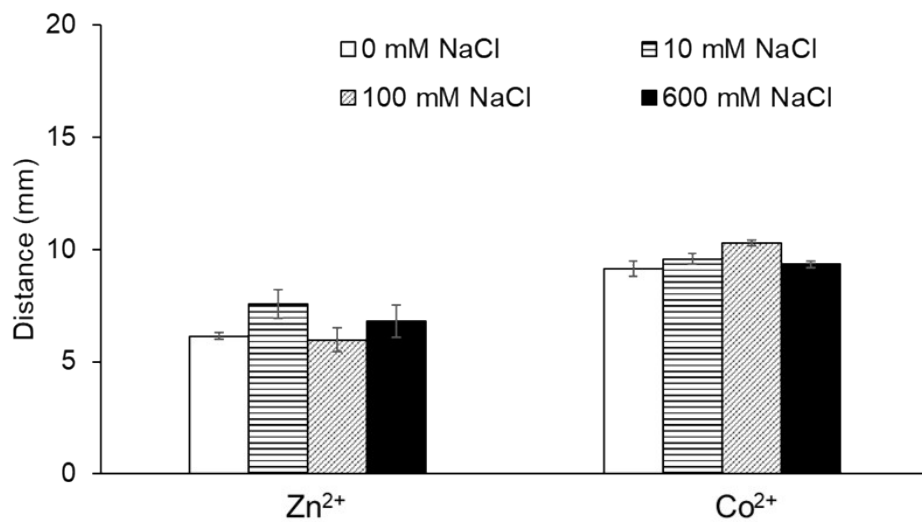

Fig. S4 Effects of NaCl concentration on the D $\mu$ PADs for metal detection.
